# Supplementary material for: Fabrication and characterization of nanostructured Cadmium Oxide thin films doped with Indium by sol-gel spin-coating for CdO (n)/Si (p) heterojunction photodiode applications
Source: Research Square preprint supplement (doi:10.21203/rs.3.rs-6444485/v1), 2025-05-20
Supplement: Supplementary file 1 [file 11ec727f7cde660a7fde8e5e.docx]

**Supplementary information**

**1. Analytical determination of electrical parameters of different CdO/Si diodes**

For CdO (n)/ c-Si (p) heterojunction diode, the current-voltage dependency can be describedthrough thermionicemission relation:

(1)

where quantities q, V, K, T, n are denoted as elementary charge, applied voltage, Boltzmann'sconstant, absolute temperature and ideality factor, respectively.

The reverse saturation current I0 can be obtained at the intercept of semi-logarithmic curve by extrapolating theforward bias ln(I)–V curve to V=0 and it can be analytically defined as:

(2)

where A is the diode area (x), A* is the effective Richardsonconstant (90 A cm-2 K-2for c-Si (p) ) and ϕb is the barrier height at zerobias[1-3]. The dark saturation current I0 can be determined by extrapolating the forward bias ln (I)–V curve to V = 0.

Using equation (1), the ideality factor n of different CdO (n) /c-Si (p) can be deduced from theslope of semi-logarithmic I-V curves at forward bias from the following analytical relationship:

(3)

It is obvious that if n varies between 1 and 2, the tunneling current mechanism is dominant, if n = 2, the generation recombination current mechanism is dominant, and if n > 2, the leakage current mechanism is dominant [3]. The values of the ideality factor n and barrier height фb of the heterojunctions are calculated from the slope intercept of the linear fit of the semi-log current–voltage plot by using the following formula:

фb= Ln (4)

and the slope

a = q /n kT (5)

The change in the barrier between the two materials, due to the change from air to nitrogen atmosphere, could be the origin of the ideality factor variation. Also the series resistance could be affected by the change from air to nitrogen atmosphere. In order to have a good estimation of the ideality factor and the barrier height it was necessary to determine the series resistance (Rs). The values of the three parameters are also calculated by using Cheung’s and Norde’s methods. According to Cheung’s method, the diode current–voltage relation with series resistance (Rs) is given by the following equation [1]:

I = I0 [eq (v-IRS /nKT) -1] (5)

Where, I Rs represents the voltage drop across the series resistance of the device. Eq. (5) can be differentiated as follow:

= I Rs+ (6)

The series resistance and the ideality factor are determined by using the slope and by extrapolating the linear part of the dV/d (ln I) versus I curve, respectively. Eq. (6) can be written as follows:

H (I) = n фb+ I Rs (7)

Where,

H (I) = V- () Ln () (8)

A plot of dV/d (In I) vs. I is linear, the slope gives the value of the series resistance, and the intercept gives the value of the ideality factor, n, of the device. We observe that there is a difference between the values of the ideality factor obtained from the forward bias ln I-V plot and from the dV/ d (ln I) - I plot. This difference could be due to the presence of a series resistance, interface states, and a voltage drop across the interfacial layers [4]. We can also calculate the series resistance and barrier height from the intercept of the H (I) curve given by Eq. (7), using the value of the ideality factor obtained from Eq. (8).

The series resistance can be also determined by Norde’s method [5]. Norde’s method uses the following function to determine the series resistance and the height barrier:

F (V) = – () Ln [](9)

Where γ is a dimensionless integer greater than n, which here is taken equal to 5 [6]; I (V) is the current obtained from the I–V characteristic. The value of the height barrier is calculated from the minimum of the F vs. V plot, which is shown in Fig. 10. The barrier height is given as:

Ф b = F(Vmin) + – (10)

Where, F (Vmin) is the minimum point of F (V) and Vmin is the corresponding voltage. The value of series resistance is calculated using the formula:

Rs = kT(γ – n) qI(11)

***Figure 1:*** *The curves Ln (I) according to the voltage for the n-CdO/p-Si and (In:CdO)/p-Siheterojunctions*

***Figure 2*** *: F (V) -V of the 3 heterojunctions.*

***Figure 3.a)****: Curves of dV/dV(Ln I) = f (V) for n-CdO/p-Si heterojunction*

***Figure 3 -b)****: Curves of dV/dV(Ln I) = f (V) for n-(In:CdO)/p-Siheterojunctions*

***Figure 4 a****: Curves of H (I) = f (I) of n-CdO/p-Si heterojunction*

***Figure 4 b****: Curves of H (I) = f (I) of n-(In:CdO)/p-Si heterojunction*

**References**

[1] Cheung S.K, Cheung N.W Appl. Phys. Lett. 49 (1986) 85–87.

[2] Singh R, Narula A.K, Appl. Phys. Lett. 71 (1997) 2845–2847.

[3] Ay I, Tolunay H, Solid-State Electron 51 (2007) 381–386.

[4] Kilicoglu T, Thin Solid Films 516 (2008) 967–970.

[5] Norde H J, Appl. Phys 50 (1979) 5052–5054.

[6] R.K. Gupta, K. Ghosh, P.K., Kahol Physica E 41 (2009) 617 –620.
